# Supplementary figures and images for: Transformation of a temporal speech cue to a spatial neural code in human auditory cortex
Source: eLife journal article supplement (doi:10.7554/elife.53051), 2020-08-25

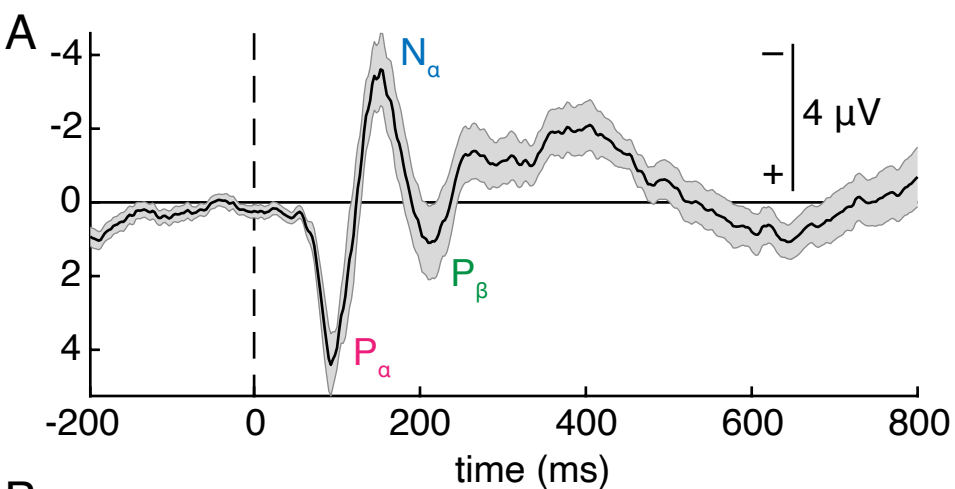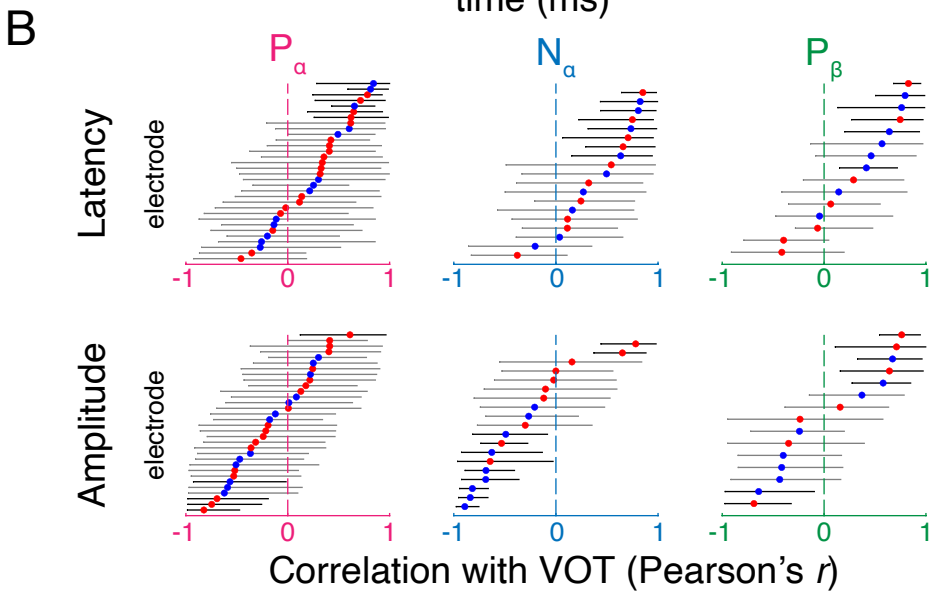

Supplement: supp [file elife-53051-supp-v1.zip]

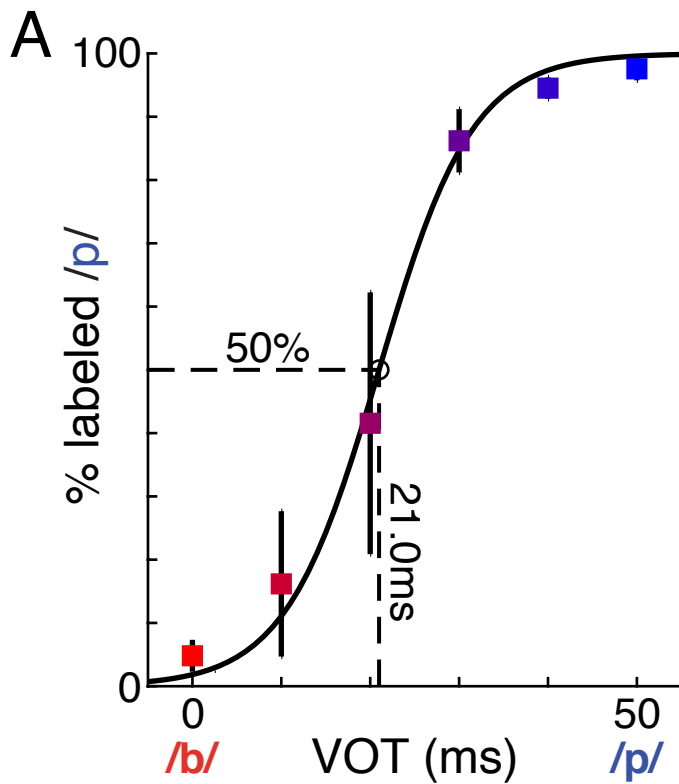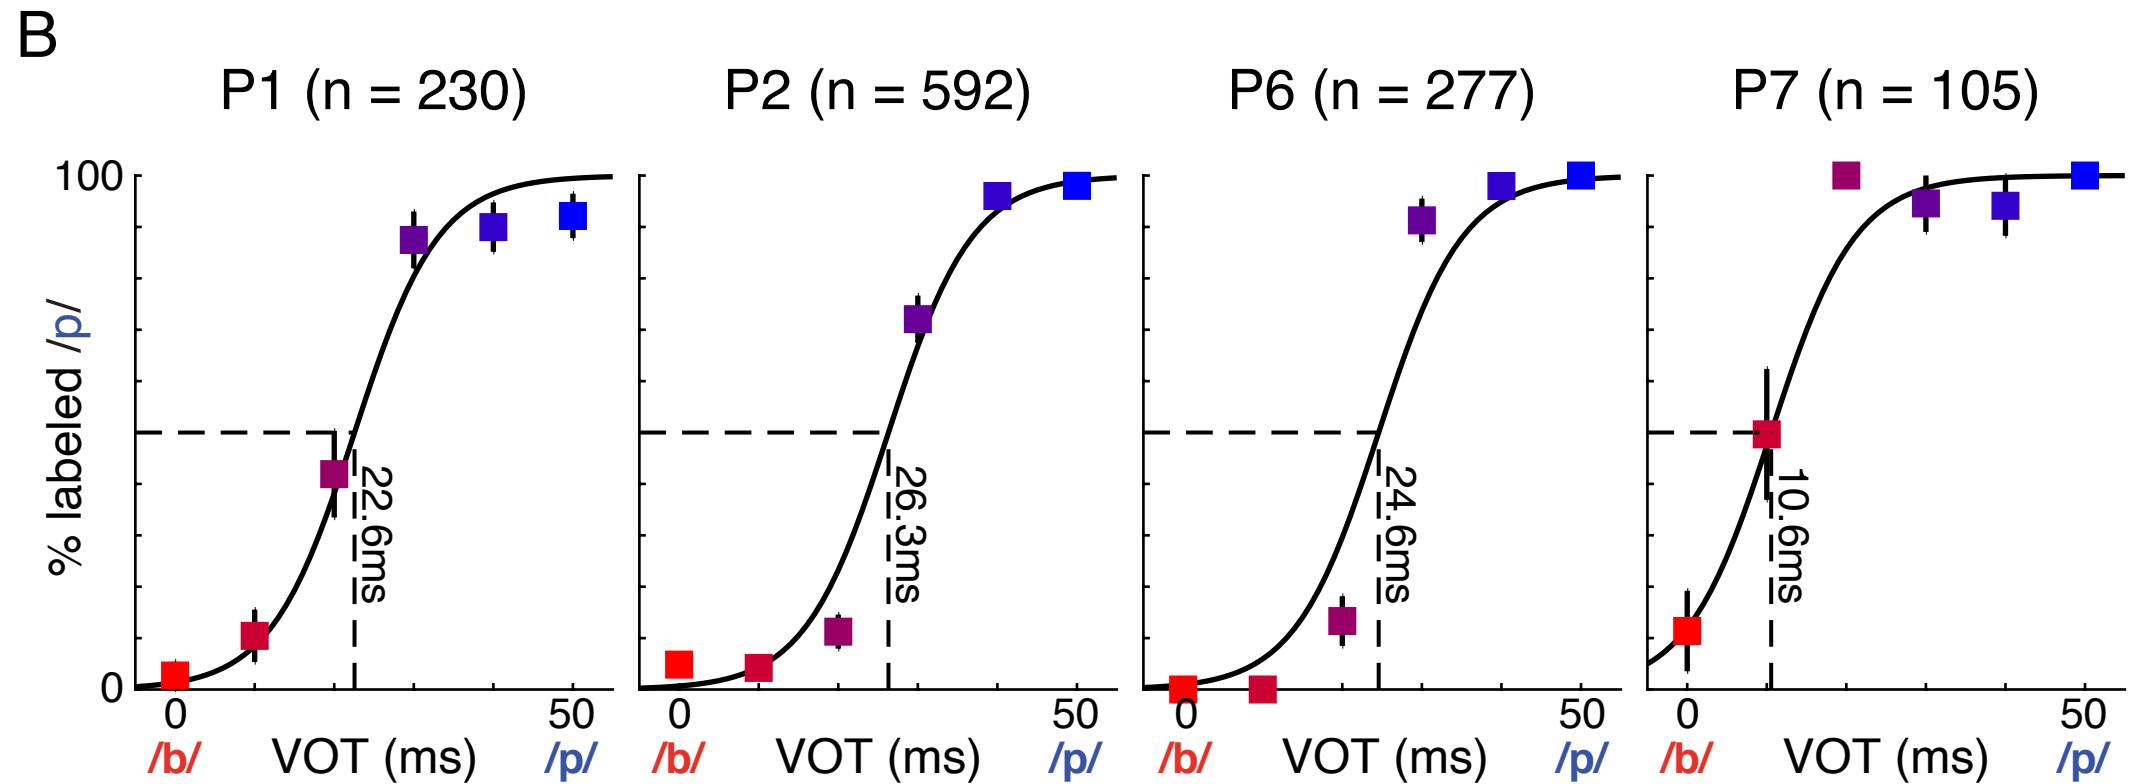

Supplement: supp [file elife-53051-supp-v1.zip]

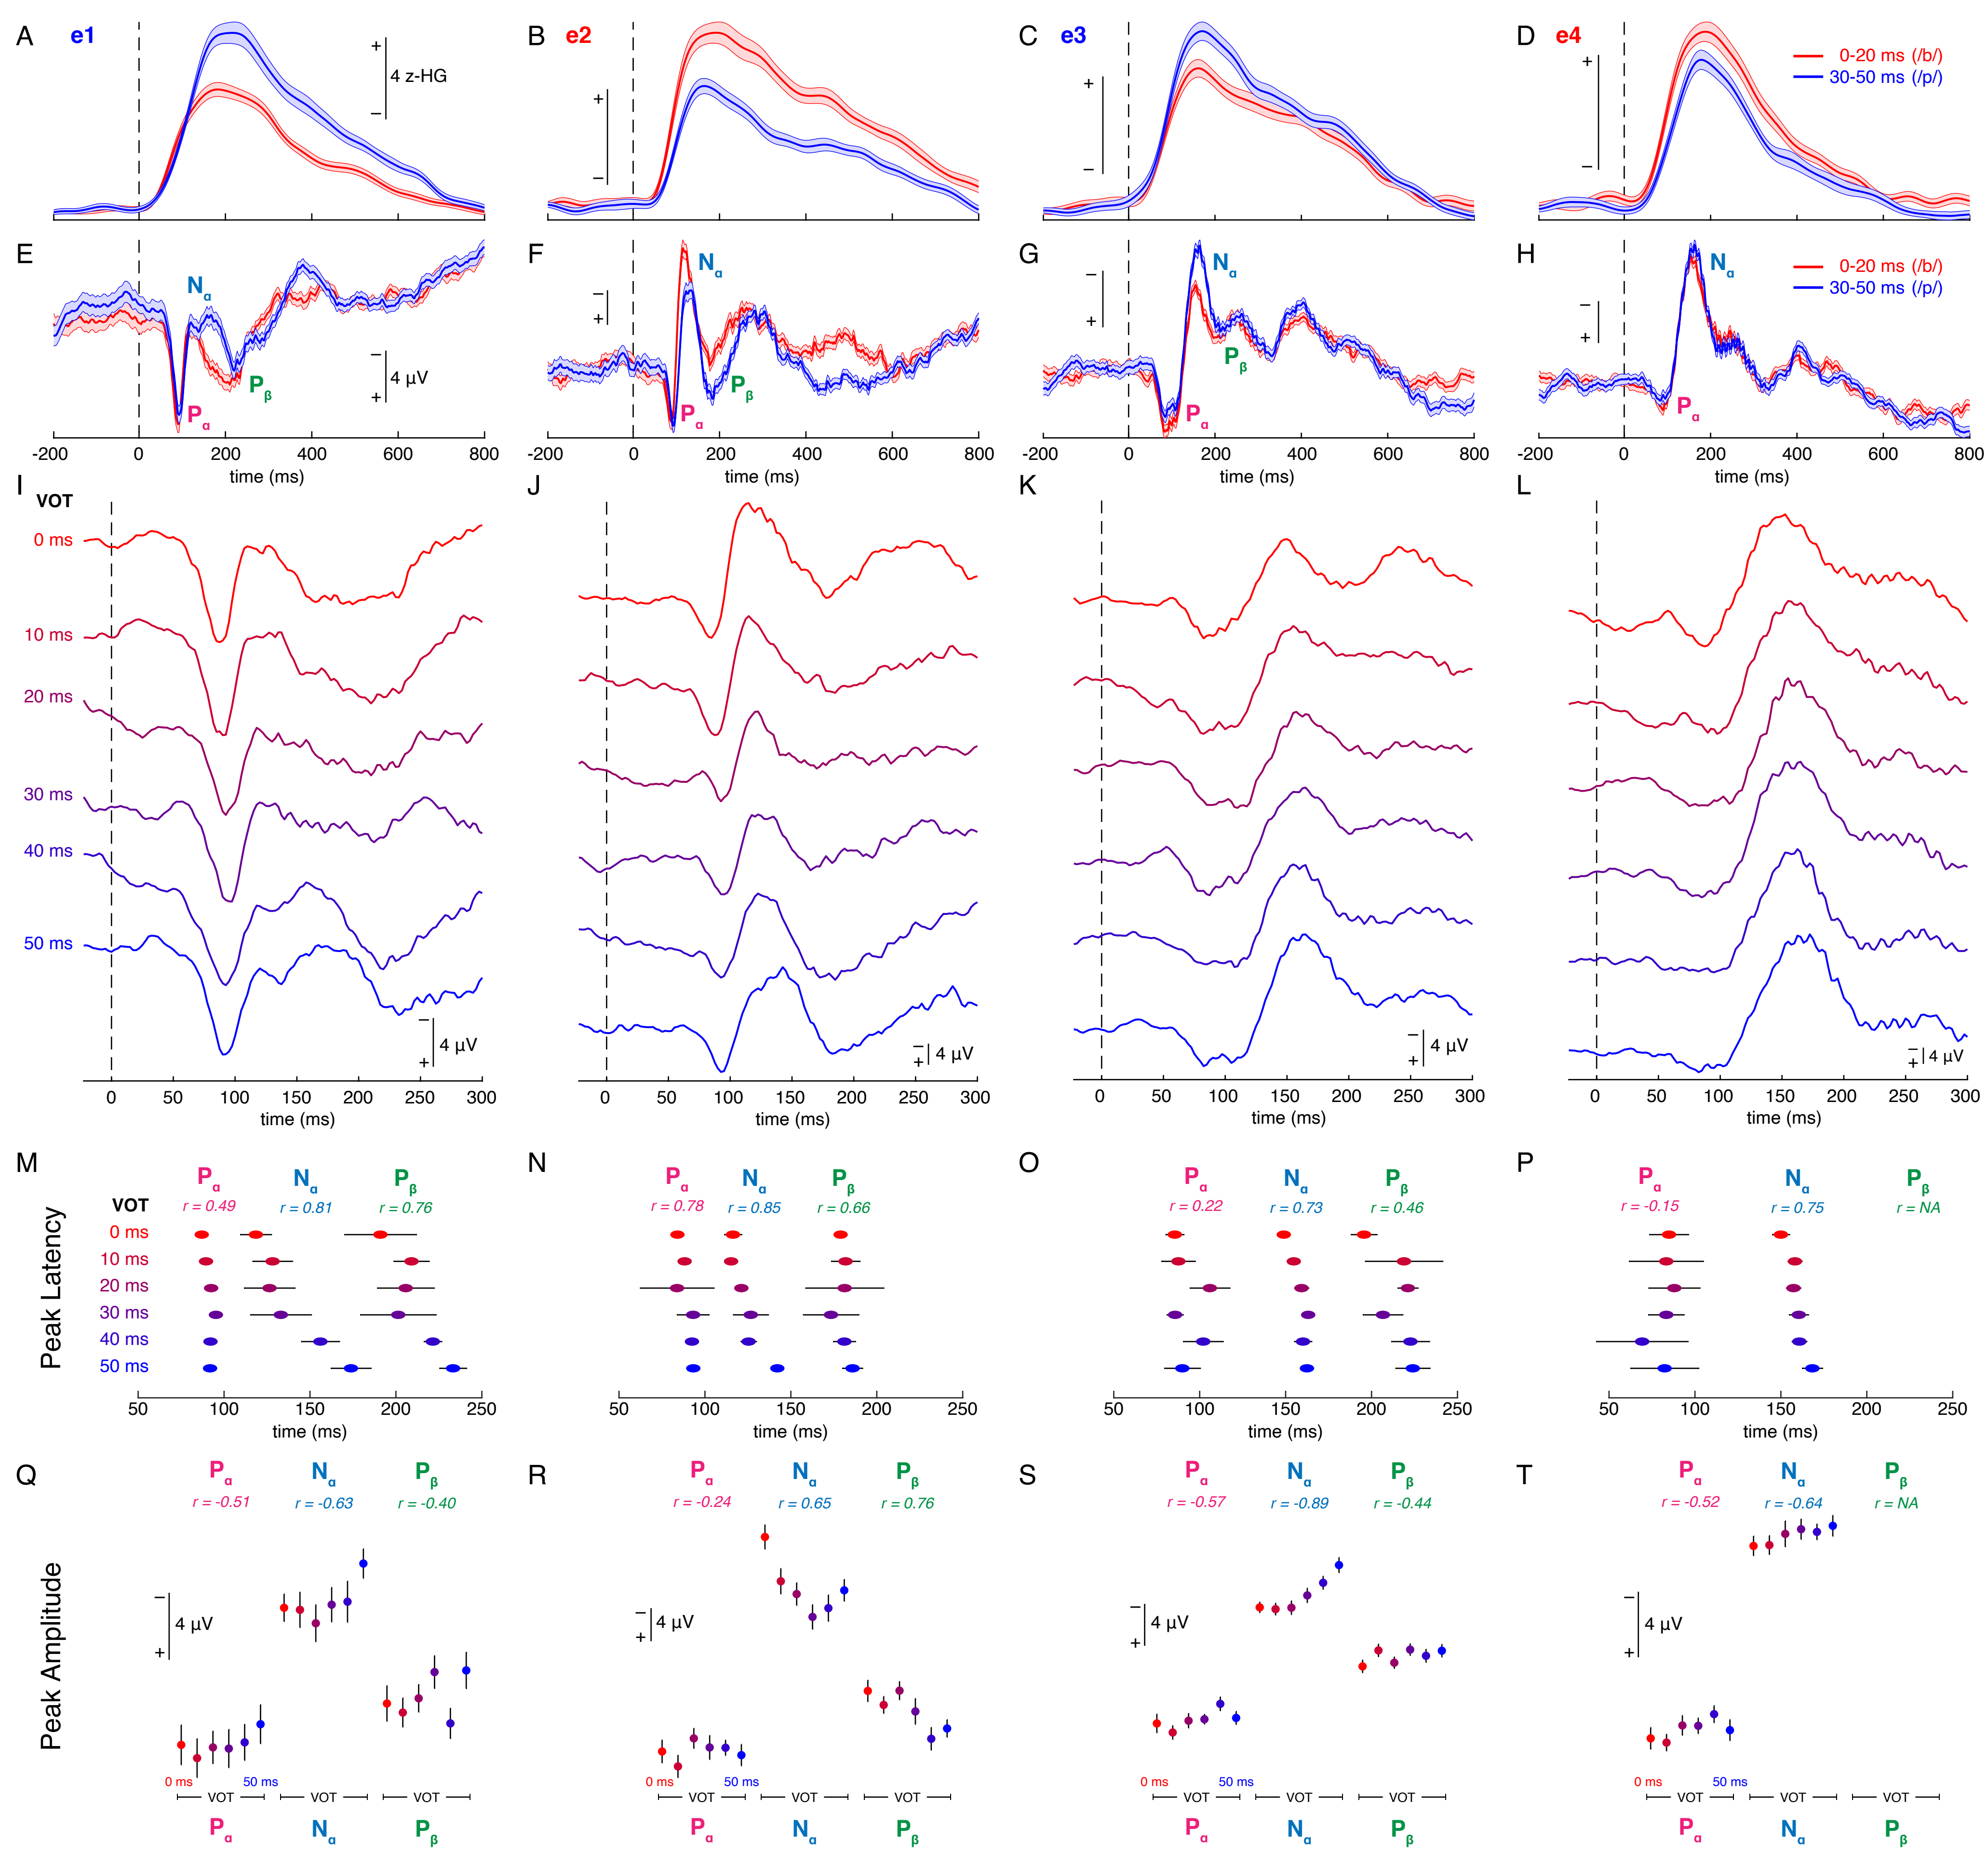

Supplement: supp [file elife-53051-supp-v1.zip]

P1

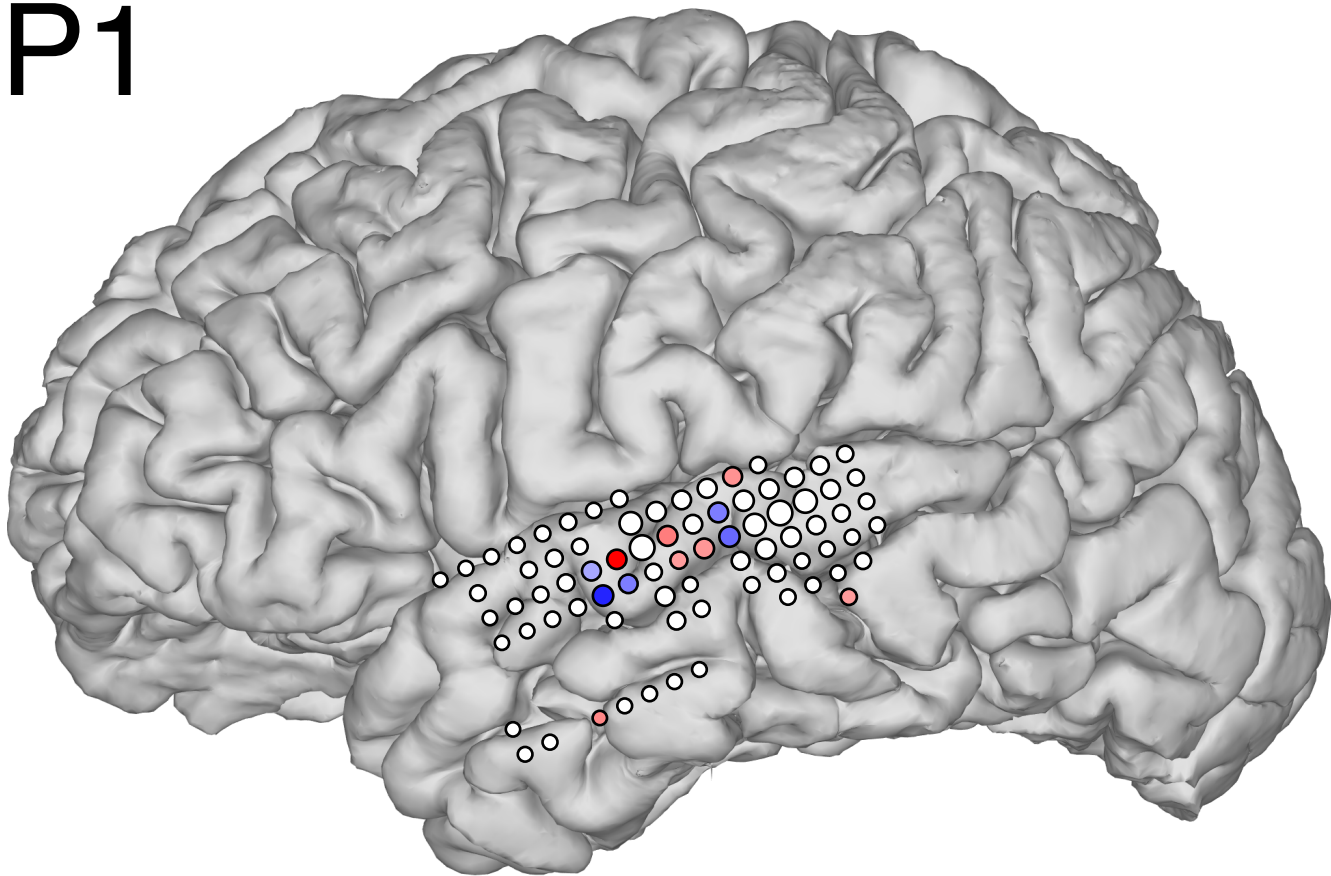

peak H<sub>G</sub> (z)

min

•

max

/p/

/b/

selectivity

0

P2

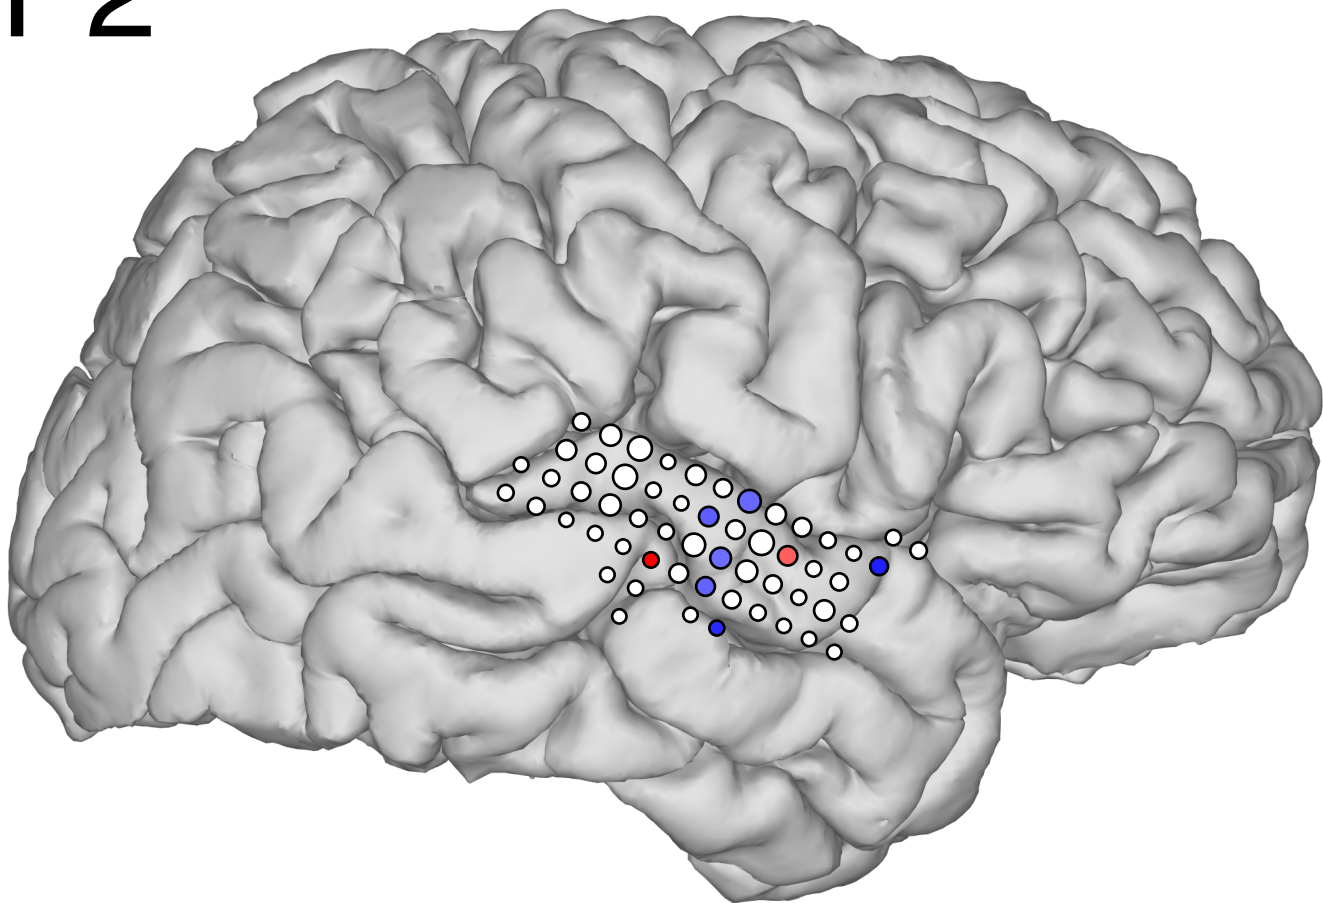

P5

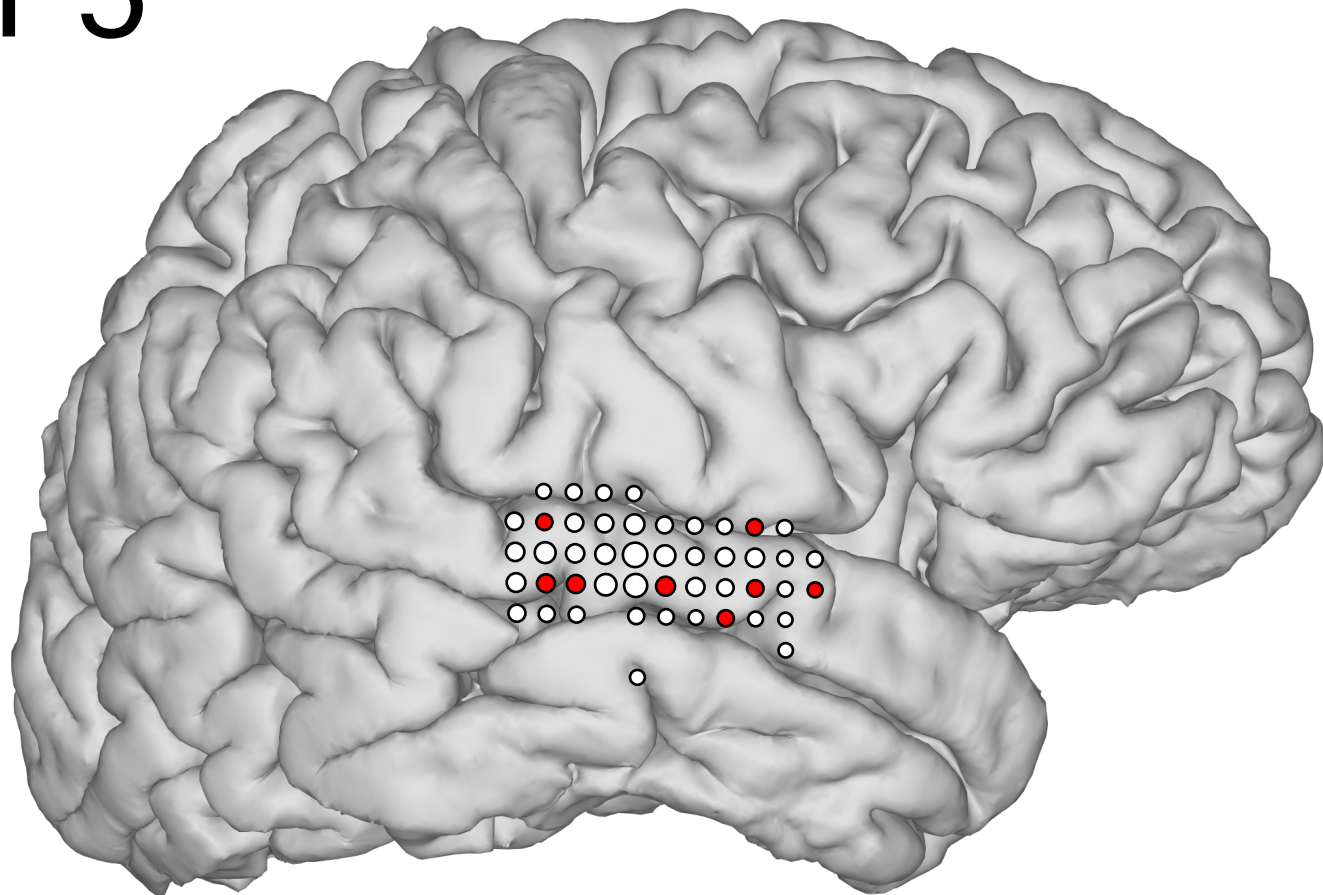

P3

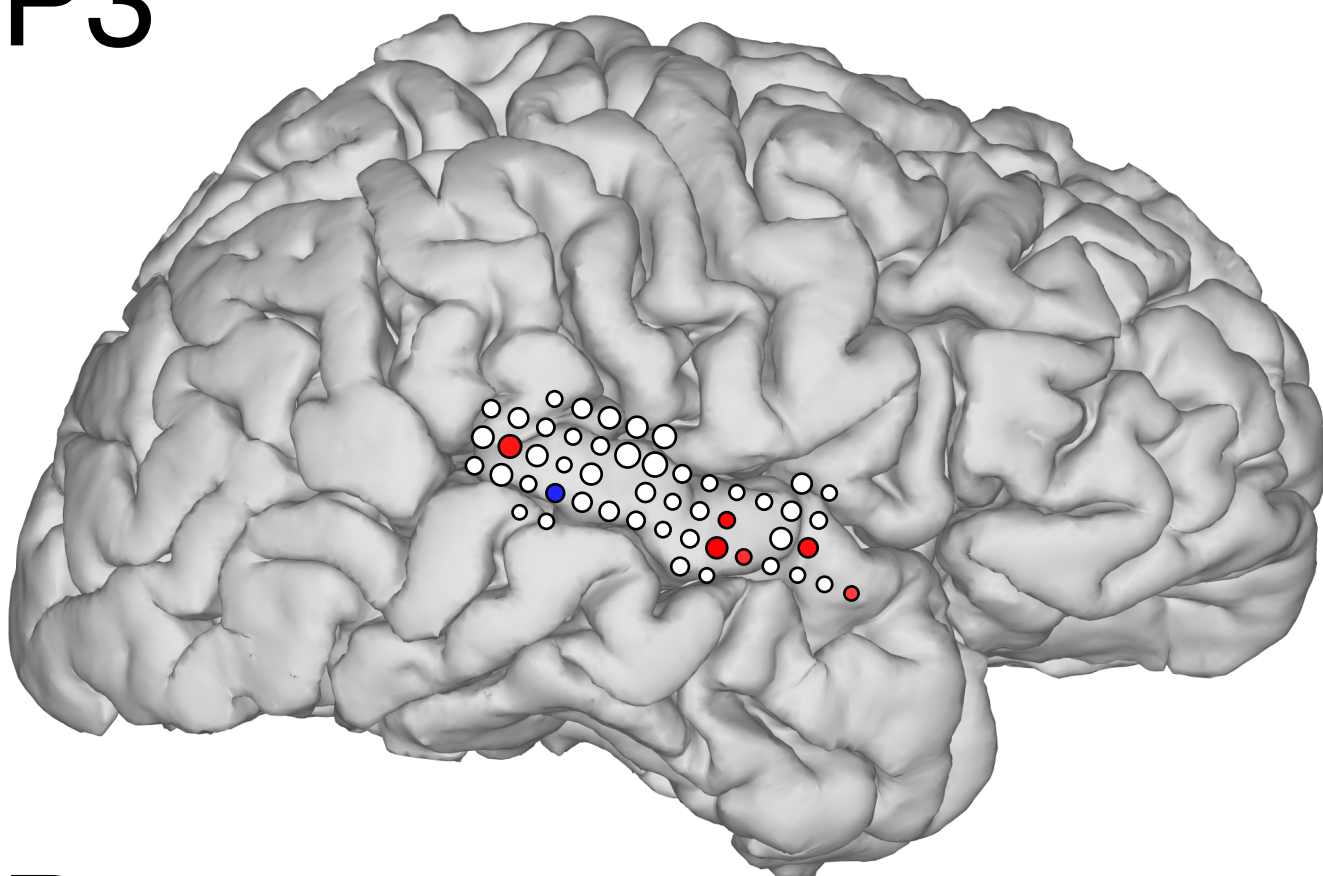

P6

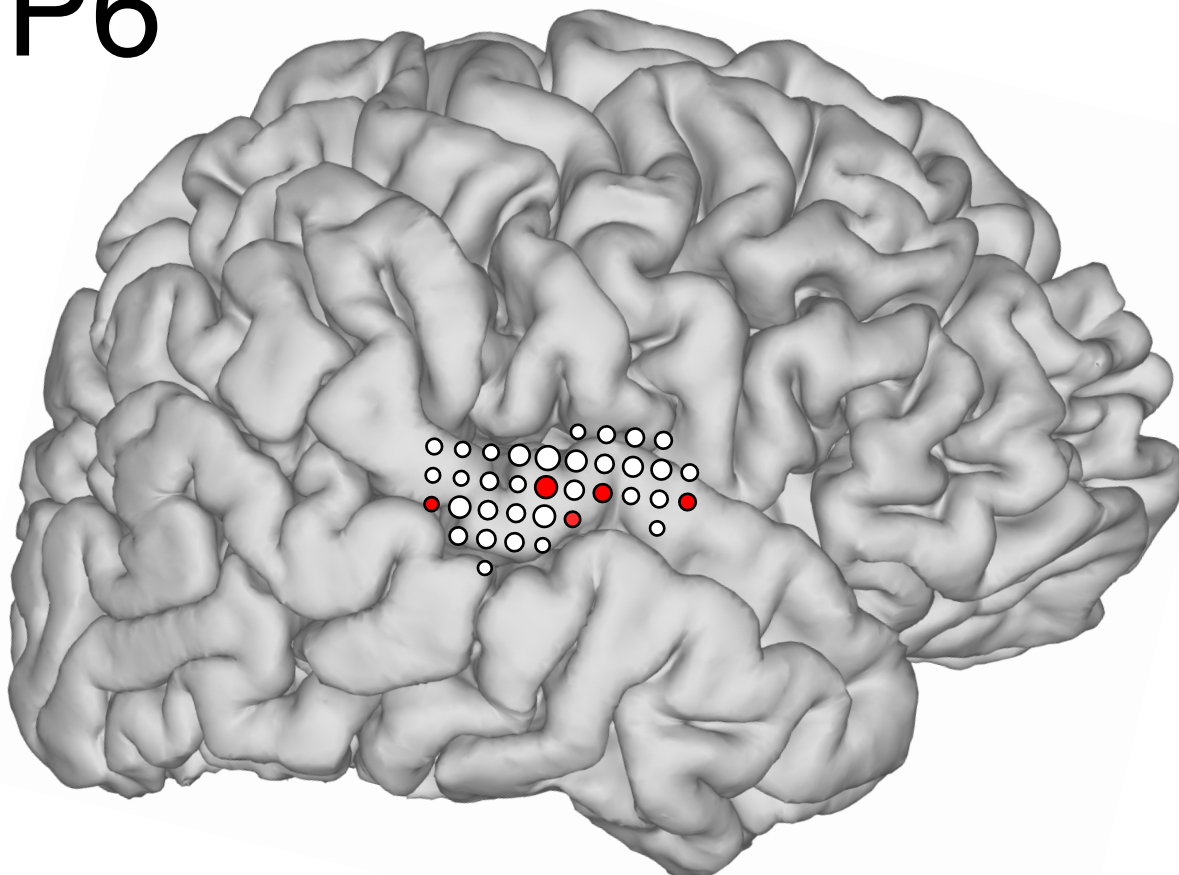

P4

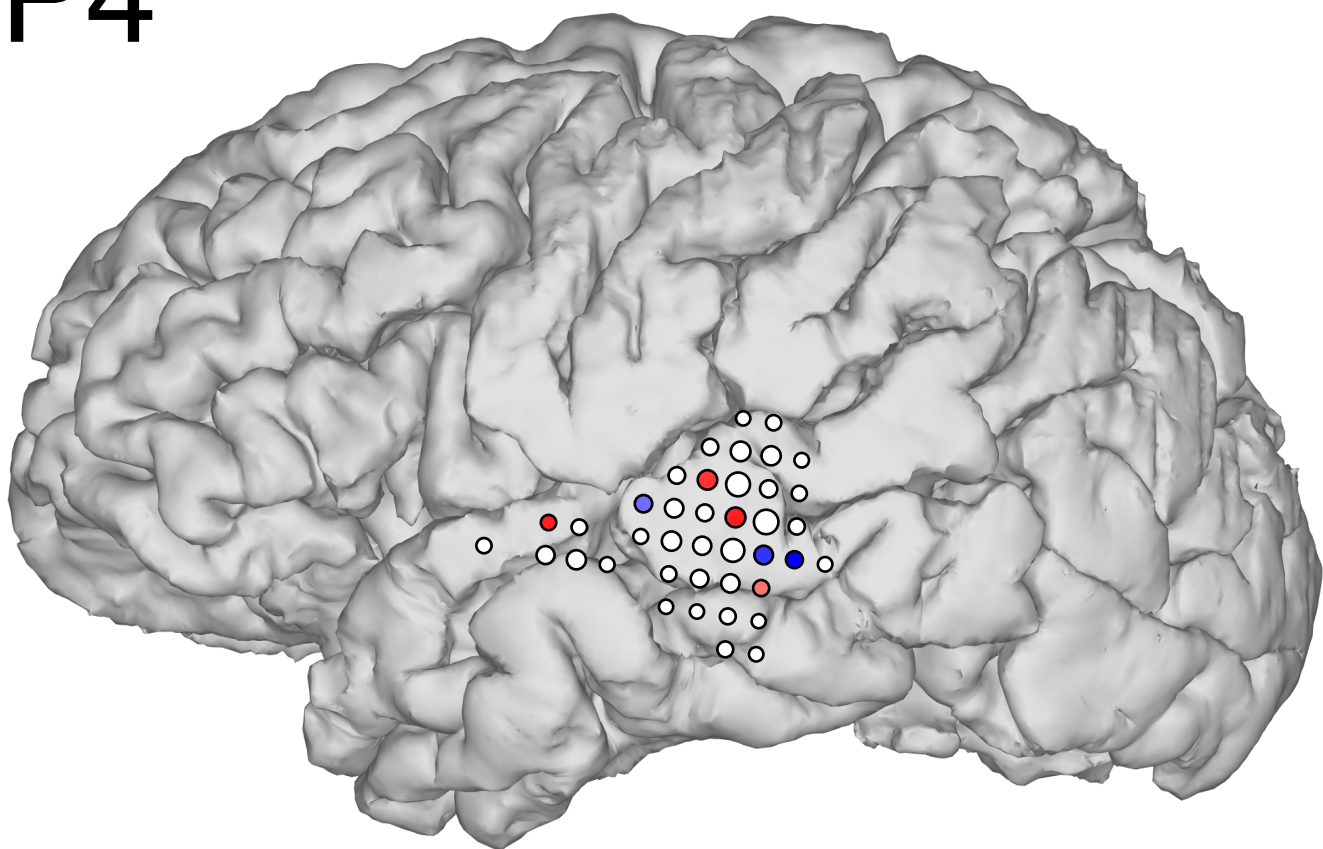

P7

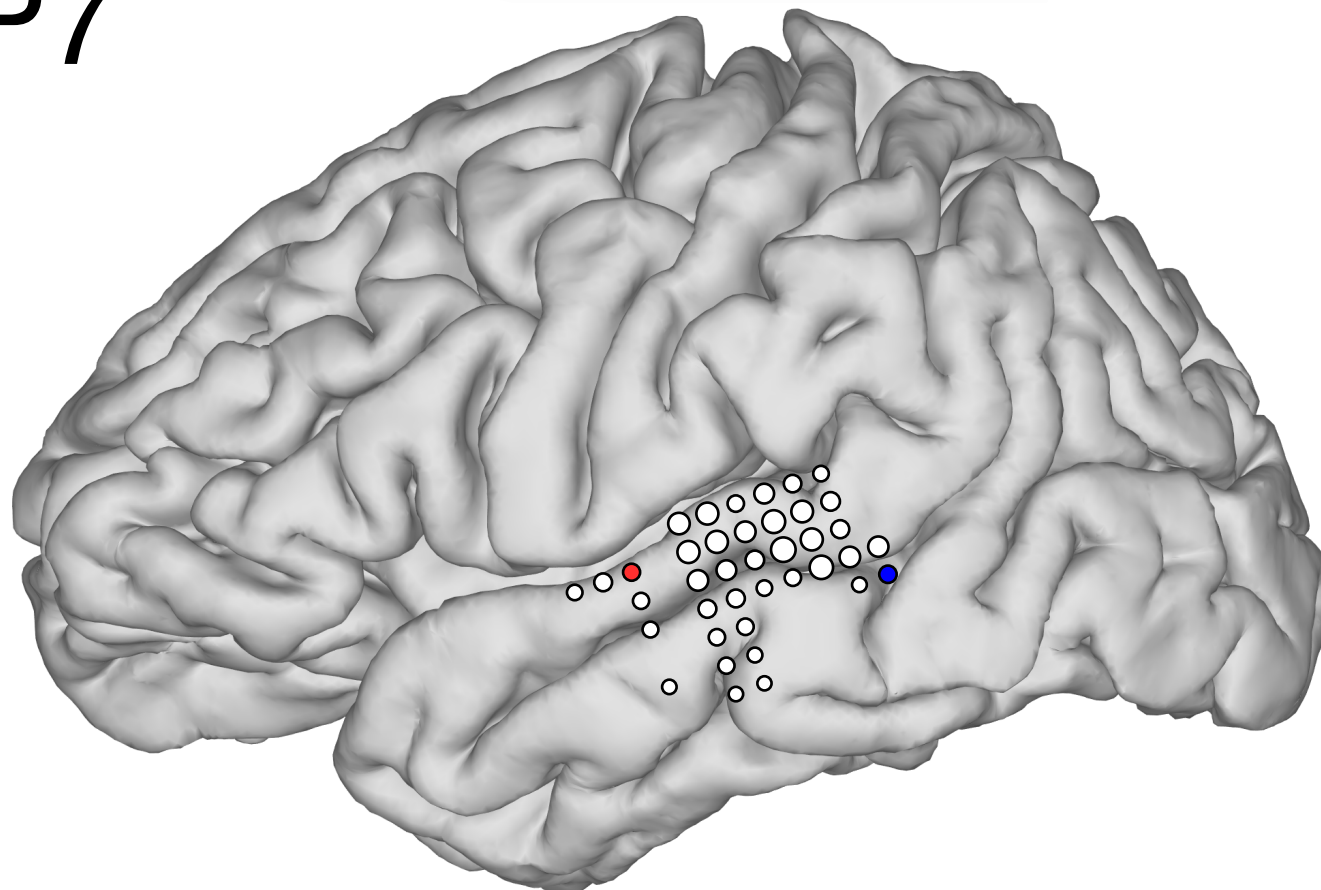

Supplement: supp [file elife-53051-supp-v1.zip]

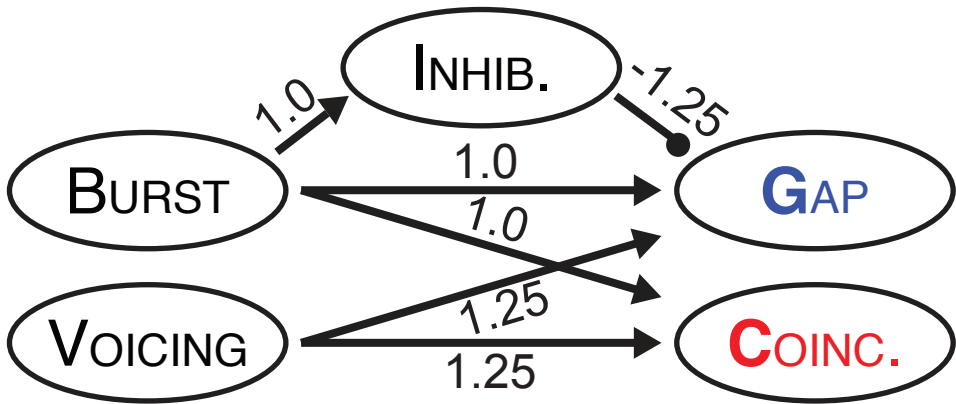

Supplement: supp [file elife-53051-supp-v1.zip]
